# Supplementary material
Source: publisher figshare collection journal article supplement (https://acs.figshare.com/ndownloader/files/4595182)
Supplement: Supplementary file 1 [file 4595182]

 
data_07006 
 
_audit_creation_method            SHELXL-97 
_chemical_name_systematic 
; 
 ? 
; 
_chemical_name_common             ? 
_chemical_melting_point           ? 
_chemical_formula_moiety          'C48 H36 Cu N4 O2' 
_chemical_formula_sum 
 'C48 H36 Cu N4 O2' 
_chemical_formula_weight          764.35 
 
loop_ 
 _atom_type_symbol 
 _atom_type_description 
 _atom_type_scat_dispersion_real 
 _atom_type_scat_dispersion_imag 
 _atom_type_scat_source 
 'C'  'C'   0.0033   0.0016 
 'International Tables Vol C Tables 4.2.6.8 and 6.1.1.4' 
 'H'  'H'   0.0000   0.0000 
 'International Tables Vol C Tables 4.2.6.8 and 6.1.1.4' 
 'N'  'N'   0.0061   0.0033 
 'International Tables Vol C Tables 4.2.6.8 and 6.1.1.4' 
 'O'  'O'   0.0106   0.0060 
 'International Tables Vol C Tables 4.2.6.8 and 6.1.1.4' 
 'Cu'  'Cu'   0.3201   1.2651 
 'International Tables Vol C Tables 4.2.6.8 and 6.1.1.4' 
 
_symmetry_cell_setting            triclinic 
_symmetry_space_group_name_H-M    P-1
_symmetry_space_group_name_Hall   '-P 1'
 
loop_ 
 _symmetry_equiv_pos_as_xyz 
 'x, y, z' 
 '-x, -y, -z' 
 
_cell_length_a                    9.8552(9) 
_cell_length_b                    12.7732(12) 
_cell_length_c                    16.4636(15) 
_cell_angle_alpha                 67.566(2) 
_cell_angle_beta                  82.610(2) 
_cell_angle_gamma                 70.749(2) 
_cell_volume                      1808.5(3) 
_cell_formula_units_Z             2 
_cell_measurement_temperature     130(2) 
_cell_measurement_reflns_used     2701 
_cell_measurement_theta_min       2.4
_cell_measurement_theta_max       23.7
 
_exptl_crystal_description        plate
_exptl_crystal_colour             'dark brown'
_exptl_crystal_size_max           0.18 
_exptl_crystal_size_mid           0.12 
_exptl_crystal_size_min           0.05 
_exptl_crystal_density_meas       ? 
_exptl_crystal_density_diffrn     1.404 
_exptl_crystal_density_method     'not measured' 
_exptl_crystal_F_000              794 
_exptl_absorpt_coefficient_mu     0.652 
_exptl_absorpt_correction_type    multi-scan 
_exptl_absorpt_correction_T_min   0.8916 
_exptl_absorpt_correction_T_max   0.9681 
_exptl_absorpt_process_details    'SADABS, R. Blessing; 1995' 
 
_exptl_special_details 
; 
 ? 
; 
 
_diffrn_ambient_temperature       130(2) 
_diffrn_radiation_wavelength      0.71073 
_diffrn_radiation_type            MoK\a 
_diffrn_radiation_source          'fine-focus sealed tube' 
_diffrn_radiation_monochromator   graphite 
_diffrn_measurement_details  
 '0.30 degree frames measured for 70 seconds each' 
_diffrn_measurement_method        \w-scans 
_diffrn_measurement_device        'three-circle goniometer with fixed chi' 
_diffrn_measurement_device_type   'Bruker Platform goniometer' 
_diffrn_detector                  'CCD area detector' 
_diffrn_detector_type             'Bruker SMART 6000' 
_diffrn_detector_area_resol_mean  44.52 
_diffrn_standards_number          ? 
_diffrn_standards_interval_count  ? 
_diffrn_standards_interval_time   ? 
_diffrn_standards_decay_%         ? 
_diffrn_reflns_number             18194 
_diffrn_reflns_av_R_equivalents   0.0493 
_diffrn_reflns_av_sigmaI/netI     0.0655 
_diffrn_reflns_limit_h_min        -12 
_diffrn_reflns_limit_h_max        12 
_diffrn_reflns_limit_k_min        -15 
_diffrn_reflns_limit_k_max        15 
_diffrn_reflns_limit_l_min        -20 
_diffrn_reflns_limit_l_max        20 
_diffrn_reflns_theta_min          2.19 
_diffrn_reflns_theta_max          26.43 
_reflns_number_total              7426 
_reflns_number_gt                 5167 
_reflns_threshold_expression      >2sigma(I) 
 
_computing_data_collection        'SMART (Bruker, 2001)' 
_computing_cell_refinement        'SAINT (Bruker, 2003)' 
_computing_data_reduction         'SAINT (Bruker, 2003)' 
_computing_structure_solution     'SIR-2004 (Burla et al., 2005)' 
_computing_structure_refinement   'SHELXL-97 (Sheldrick, 1997)' 
_computing_molecular_graphics     'SHELXTL (Bruker, 2003), XTEL (loc. libr.)' 
_computing_publication_material   'SHELXTL (Bruker, 2003)'
 
_refine_special_details 
; 
 Refinement of F^2^ against ALL reflections.  The weighted R-factor wR and 
 goodness of fit S are based on F^2^, conventional R-factors R are based 
 on F, with F set to zero for negative F^2^. The threshold expression of 
 F^2^ > 2sigma(F^2^) is used only for calculating R-factors(gt) etc. and is 
 not relevant to the choice of reflections for refinement.  R-factors based 
 on F^2^ are statistically about twice as large as those based on F, and R- 
 factors based on ALL data will be even larger. 
; 
 
_refine_ls_structure_factor_coef  Fsqd  
_refine_ls_matrix_type            full 
_refine_ls_weighting_scheme       calc  
_refine_ls_weighting_details 
 'calc w=1/[\s^2^(Fo^2^)+(0.0657P)^2^+0.6872P] where P=(Fo^2^+2Fc^2^)/3' 
_atom_sites_solution_primary      direct 
_atom_sites_solution_secondary    difmap 
_atom_sites_solution_hydrogens    geom 
_refine_ls_hydrogen_treatment     riding 
_refine_ls_extinction_method      none 
_refine_ls_extinction_coef        ? 
_refine_ls_number_reflns          7426 
_refine_ls_number_parameters      497 
_refine_ls_number_restraints      0 
_refine_ls_R_factor_all           0.0808 
_refine_ls_R_factor_gt            0.0496 
_refine_ls_wR_factor_ref          0.1349 
_refine_ls_wR_factor_gt           0.1206 
_refine_ls_goodness_of_fit_ref    1.017 
_refine_ls_restrained_S_all       1.017 
_refine_ls_shift/su_max           0.000 
_refine_ls_shift/su_mean          0.000 
 
loop_ 
 _atom_site_label 
 _atom_site_type_symbol 
 _atom_site_fract_x 
 _atom_site_fract_y 
 _atom_site_fract_z 
 _atom_site_U_iso_or_equiv 
 _atom_site_adp_type 
 _atom_site_occupancy 
 _atom_site_symmetry_multiplicity 
 _atom_site_calc_flag 
 _atom_site_refinement_flags 
 _atom_site_disorder_assembly 
 _atom_site_disorder_group 
Cu1 Cu 0.85661(4) 0.44093(3) 0.13373(3) 0.02821(13) Uani 1 1 d . . . 
O1 O 0.5397(3) 0.5026(2) -0.11132(16) 0.0454(6) Uani 1 1 d . . . 
N1 N 0.7989(3) 0.5167(2) 0.01499(17) 0.0296(6) Uani 1 1 d . . . 
N2 N 0.9814(3) 0.3037(2) 0.10050(17) 0.0285(6) Uani 1 1 d . . . 
N3 N 0.9175(3) 0.3637(2) 0.25499(17) 0.0283(6) Uani 1 1 d . . . 
N4 N 0.7160(3) 0.5817(2) 0.15487(17) 0.0294(6) Uani 1 1 d . . . 
C1 C 0.6915(3) 0.6175(2) -0.0275(2) 0.0284(7) Uani 1 1 d . . . 
C2 C 0.7179(3) 0.5931(3) -0.1137(2) 0.0320(7) Uani 1 1 d . . . 
H2 H 0.7660 0.6474 -0.1595 0.038 Uiso 1 1 calc R . . 
C3 C 0.8256(3) 0.4798(3) -0.0541(2) 0.0294(7) Uani 1 1 d . . . 
C4 C 0.5965(3) 0.5786(3) -0.1495(2) 0.0320(7) Uani 1 1 d . . . 
C5 C 0.9106(3) 0.3697(3) -0.0549(2) 0.0292(7) Uani 1 1 d . . . 
C6 C 0.9906(3) 0.2881(3) 0.0220(2) 0.0292(7) Uani 1 1 d . . . 
C7 C 1.0948(3) 0.1757(3) 0.0290(2) 0.0328(7) Uani 1 1 d . . . 
H7 H 1.1223 0.1442 -0.0165 0.039 Uiso 1 1 calc R . . 
C8 C 1.1466(3) 0.1228(3) 0.1114(2) 0.0327(7) Uani 1 1 d . . . 
H8 H 1.2170 0.0473 0.1346 0.039 Uiso 1 1 calc R . . 
C9 C 1.0758(3) 0.2016(2) 0.1579(2) 0.0289(7) Uani 1 1 d . . . 
C10 C 1.0956(3) 0.1794(3) 0.2452(2) 0.0295(7) Uani 1 1 d . . . 
C11 C 1.0241(3) 0.2573(2) 0.2902(2) 0.0293(7) Uani 1 1 d . . . 
C12 C 1.0515(4) 0.2388(3) 0.3782(2) 0.0360(8) Uani 1 1 d . . . 
H12 H 1.1204 0.1727 0.4169 0.043 Uiso 1 1 calc R . . 
C13 C 0.9610(3) 0.3332(3) 0.3966(2) 0.0342(7) Uani 1 1 d . . . 
H13 H 0.9553 0.3457 0.4505 0.041 Uiso 1 1 calc R . . 
C14 C 0.8760(3) 0.4101(3) 0.3203(2) 0.0303(7) Uani 1 1 d . . . 
C15 C 0.7664(3) 0.5183(3) 0.3123(2) 0.0316(7) Uani 1 1 d . . . 
C16 C 0.6892(3) 0.5944(3) 0.2358(2) 0.0305(7) Uani 1 1 d . . . 
C17 C 0.5646(3) 0.6955(3) 0.2295(2) 0.0339(7) Uani 1 1 d . . . 
H17 H 0.5230 0.7236 0.2755 0.041 Uiso 1 1 calc R . . 
C18 C 0.5180(3) 0.7428(3) 0.1456(2) 0.0335(7) Uani 1 1 d . . . 
H18 H 0.4367 0.8100 0.1220 0.040 Uiso 1 1 calc R . . 
C19 C 0.6133(3) 0.6732(2) 0.0984(2) 0.0278(7) Uani 1 1 d . . . 
C20 C 0.5999(3) 0.6951(2) 0.0085(2) 0.0278(7) Uani 1 1 d . . . 
C21 C 0.9071(3) 0.3367(3) -0.1309(2) 0.0310(7) Uani 1 1 d . . . 
C22 C 0.9165(4) 0.4153(3) -0.2162(2) 0.0368(8) Uani 1 1 d . . . 
H22 H 0.9284 0.4897 -0.2250 0.044 Uiso 1 1 calc R . . 
C23 C 0.9089(4) 0.3874(3) -0.2881(2) 0.0446(9) Uani 1 1 d . . . 
H23 H 0.9174 0.4416 -0.3458 0.054 Uiso 1 1 calc R . . 
C24 C 0.8888(4) 0.2797(3) -0.2762(2) 0.0436(9) Uani 1 1 d . . . 
H24 H 0.8825 0.2603 -0.3256 0.052 Uiso 1 1 calc R . . 
C25 C 0.8781(4) 0.2022(3) -0.1932(3) 0.0417(9) Uani 1 1 d . . . 
H25 H 0.8651 0.1284 -0.1849 0.050 Uiso 1 1 calc R . . 
C26 C 0.8861(3) 0.2297(3) -0.1206(2) 0.0366(8) Uani 1 1 d . . . 
H26 H 0.8771 0.1751 -0.0633 0.044 Uiso 1 1 calc R . . 
C27 C 1.1976(3) 0.0620(3) 0.2979(2) 0.0316(7) Uani 1 1 d . . . 
C28 C 1.3452(4) 0.0376(3) 0.2854(2) 0.0392(8) Uani 1 1 d . . . 
H28 H 1.3834 0.0960 0.2433 0.047 Uiso 1 1 calc R . . 
C29 C 1.4374(4) -0.0731(3) 0.3348(2) 0.0433(9) Uani 1 1 d . . . 
H29 H 1.5384 -0.0897 0.3263 0.052 Uiso 1 1 calc R . . 
C30 C 1.3824(4) -0.1580(3) 0.3957(2) 0.0402(8) Uani 1 1 d . . . 
H30 H 1.4455 -0.2332 0.4291 0.048 Uiso 1 1 calc R . . 
C31 C 1.2373(4) -0.1344(3) 0.4084(2) 0.0399(8) Uani 1 1 d . . . 
H31 H 1.1998 -0.1932 0.4507 0.048 Uiso 1 1 calc R . . 
C32 C 1.1439(4) -0.0244(3) 0.3594(2) 0.0371(8) Uani 1 1 d . . . 
H32 H 1.0430 -0.0088 0.3682 0.045 Uiso 1 1 calc R . . 
C33 C 0.7359(3) 0.5526(3) 0.3912(2) 0.0349(8) Uani 1 1 d . . . 
C34 C 0.6839(4) 0.4842(3) 0.4685(2) 0.0410(8) Uani 1 1 d . . . 
H34 H 0.6603 0.4171 0.4701 0.049 Uiso 1 1 calc R . . 
C35 C 0.6661(4) 0.5121(4) 0.5432(3) 0.0534(10) Uani 1 1 d . . . 
H35 H 0.6298 0.4647 0.5955 0.064 Uiso 1 1 calc R . . 
C36 C 0.7011(4) 0.6090(4) 0.5421(3) 0.0573(12) Uani 1 1 d . . . 
H36 H 0.6922 0.6266 0.5940 0.069 Uiso 1 1 calc R . . 
C37 C 0.7489(4) 0.6797(3) 0.4653(3) 0.0534(11) Uani 1 1 d . . . 
H37 H 0.7709 0.7474 0.4640 0.064 Uiso 1 1 calc R . . 
C38 C 0.7653(4) 0.6532(3) 0.3897(3) 0.0435(9) Uani 1 1 d . . . 
H38 H 0.7965 0.7036 0.3367 0.052 Uiso 1 1 calc R . . 
C39 C 0.4782(3) 0.7955(2) -0.04373(19) 0.0279(7) Uani 1 1 d . . . 
C40 C 0.4728(3) 0.9131(3) -0.0640(2) 0.0342(7) Uani 1 1 d . . . 
H40 H 0.5483 0.9299 -0.0457 0.041 Uiso 1 1 calc R . . 
C41 C 0.3573(4) 1.0063(3) -0.1111(2) 0.0375(8) Uani 1 1 d . . . 
H41 H 0.3536 1.0863 -0.1239 0.045 Uiso 1 1 calc R . . 
C42 C 0.2486(3) 0.9827(3) -0.1391(2) 0.0361(8) Uani 1 1 d . . . 
H42 H 0.1707 1.0462 -0.1721 0.043 Uiso 1 1 calc R . . 
C43 C 0.2533(3) 0.8667(3) -0.1192(2) 0.0361(8) Uani 1 1 d . . . 
H43 H 0.1782 0.8504 -0.1384 0.043 Uiso 1 1 calc R . . 
C44 C 0.3668(3) 0.7732(3) -0.0713(2) 0.0316(7) Uani 1 1 d . . . 
H44 H 0.3682 0.6934 -0.0573 0.038 Uiso 1 1 calc R . . 
O2 O 0.5592(2) 0.66043(19) -0.22966(14) 0.0376(5) Uani 1 1 d . . . 
C45 C 0.4399(4) 0.6529(3) -0.2697(3) 0.0511(10) Uani 1 1 d . . . 
H45A H 0.3602 0.6453 -0.2268 0.061 Uiso 1 1 calc R . . 
H45B H 0.4722 0.5816 -0.2862 0.061 Uiso 1 1 calc R . . 
C46 C 0.3887(5) 0.7611(3) -0.3489(3) 0.0581(11) Uani 1 1 d . . . 
H46A H 0.4722 0.7725 -0.3878 0.070 Uiso 1 1 calc R . . 
H46B H 0.3219 0.7476 -0.3811 0.070 Uiso 1 1 calc R . . 
C47 C 0.3161(5) 0.8706(4) -0.3320(3) 0.0686(13) Uani 1 1 d . . . 
H47A H 0.3793 0.8813 -0.2956 0.082 Uiso 1 1 calc R . . 
H47B H 0.2272 0.8628 -0.2979 0.082 Uiso 1 1 calc R . . 
C48 C 0.2763(6) 0.9835(4) -0.4175(3) 0.0734(14) Uani 1 1 d . . . 
H48A H 0.3637 0.9919 -0.4517 0.110 Uiso 1 1 calc R . . 
H48B H 0.2303 1.0540 -0.4019 0.110 Uiso 1 1 calc R . . 
H48C H 0.2098 0.9754 -0.4526 0.110 Uiso 1 1 calc R . . 
 
loop_ 
 _atom_site_aniso_label 
 _atom_site_aniso_U_11 
 _atom_site_aniso_U_22 
 _atom_site_aniso_U_33 
 _atom_site_aniso_U_23 
 _atom_site_aniso_U_13 
 _atom_site_aniso_U_12 
Cu1 0.0276(2) 0.01545(18) 0.0354(2) -0.00350(15) -0.00887(15) -0.00237(14) 
O1 0.0502(15) 0.0353(13) 0.0468(15) 0.0012(11) -0.0124(12) -0.0225(12) 
N1 0.0291(14) 0.0189(12) 0.0360(15) -0.0063(11) -0.0060(11) -0.0037(10) 
N2 0.0264(13) 0.0184(12) 0.0358(15) -0.0036(11) -0.0093(11) -0.0047(10) 
N3 0.0274(13) 0.0164(12) 0.0369(15) -0.0053(11) -0.0079(11) -0.0037(10) 
N4 0.0310(14) 0.0183(12) 0.0347(15) -0.0043(11) -0.0093(11) -0.0052(11) 
C1 0.0317(16) 0.0185(14) 0.0294(16) -0.0009(12) -0.0076(13) -0.0070(12) 
C2 0.0318(17) 0.0218(15) 0.0362(18) -0.0027(13) -0.0049(14) -0.0081(13) 
C3 0.0283(16) 0.0225(15) 0.0329(17) -0.0038(13) -0.0057(13) -0.0075(13) 
C4 0.0340(17) 0.0176(14) 0.0367(18) -0.0050(13) -0.0066(14) -0.0014(13) 
C5 0.0260(15) 0.0227(15) 0.0342(17) -0.0057(13) -0.0048(13) -0.0052(12) 
C6 0.0249(15) 0.0198(14) 0.0413(19) -0.0085(13) -0.0022(13) -0.0068(12) 
C7 0.0289(16) 0.0236(15) 0.0427(19) -0.0111(14) -0.0033(14) -0.0040(13) 
C8 0.0292(16) 0.0192(15) 0.044(2) -0.0079(13) -0.0077(14) -0.0012(13) 
C9 0.0248(15) 0.0171(14) 0.0404(18) -0.0048(13) -0.0067(13) -0.0051(12) 
C10 0.0256(15) 0.0199(14) 0.0390(18) -0.0044(13) -0.0091(13) -0.0057(12) 
C11 0.0282(16) 0.0189(14) 0.0378(18) -0.0043(13) -0.0093(13) -0.0069(12) 
C12 0.0351(18) 0.0227(16) 0.0415(19) -0.0035(14) -0.0165(15) -0.0015(13) 
C13 0.0378(18) 0.0243(16) 0.0354(18) -0.0056(13) -0.0144(14) -0.0041(14) 
C14 0.0322(17) 0.0199(14) 0.0367(18) -0.0050(13) -0.0113(14) -0.0072(13) 
C15 0.0334(17) 0.0205(15) 0.0397(18) -0.0079(13) -0.0091(14) -0.0067(13) 
C16 0.0329(17) 0.0218(15) 0.0358(18) -0.0072(13) -0.0068(14) -0.0083(13) 
C17 0.0356(18) 0.0212(15) 0.0401(19) -0.0081(13) -0.0089(15) -0.0029(13) 
C18 0.0354(17) 0.0198(15) 0.0391(19) -0.0054(13) -0.0088(14) -0.0034(13) 
C19 0.0252(15) 0.0172(14) 0.0368(18) -0.0041(12) -0.0061(13) -0.0057(12) 
C20 0.0283(16) 0.0150(13) 0.0353(17) -0.0031(12) -0.0059(13) -0.0057(12) 
C21 0.0212(15) 0.0243(15) 0.0400(18) -0.0052(13) -0.0098(13) -0.0017(12) 
C22 0.0367(18) 0.0305(17) 0.043(2) -0.0097(15) -0.0094(15) -0.0103(14) 
C23 0.049(2) 0.039(2) 0.040(2) -0.0057(16) -0.0133(17) -0.0121(17) 
C24 0.043(2) 0.043(2) 0.048(2) -0.0198(17) -0.0142(17) -0.0081(16) 
C25 0.0343(18) 0.0278(17) 0.061(2) -0.0149(17) -0.0100(17) -0.0053(14) 
C26 0.0329(18) 0.0283(17) 0.043(2) -0.0098(15) -0.0049(15) -0.0049(14) 
C27 0.0375(18) 0.0168(14) 0.0355(18) -0.0048(13) -0.0113(14) -0.0033(13) 
C28 0.0328(18) 0.0258(16) 0.049(2) -0.0046(15) -0.0083(15) -0.0043(14) 
C29 0.0331(18) 0.0332(18) 0.052(2) -0.0100(16) -0.0139(16) 0.0031(15) 
C30 0.049(2) 0.0194(15) 0.040(2) -0.0065(14) -0.0174(16) 0.0061(14) 
C31 0.046(2) 0.0207(16) 0.042(2) -0.0002(14) -0.0109(16) -0.0051(14) 
C32 0.0341(18) 0.0235(16) 0.045(2) -0.0036(14) -0.0077(15) -0.0050(14) 
C33 0.0322(17) 0.0255(16) 0.043(2) -0.0127(14) -0.0180(15) 0.0030(13) 
C34 0.041(2) 0.0312(18) 0.042(2) -0.0110(15) -0.0135(16) 0.0021(15) 
C35 0.051(2) 0.050(2) 0.043(2) -0.0165(18) -0.0142(18) 0.0098(19) 
C36 0.053(2) 0.056(3) 0.057(3) -0.033(2) -0.029(2) 0.017(2) 
C37 0.048(2) 0.036(2) 0.074(3) -0.030(2) -0.033(2) 0.0126(17) 
C38 0.040(2) 0.0303(17) 0.054(2) -0.0153(16) -0.0211(17) 0.0055(15) 
C39 0.0289(16) 0.0204(14) 0.0276(16) -0.0049(12) -0.0036(13) -0.0023(12) 
C40 0.0301(17) 0.0224(15) 0.0440(19) -0.0054(14) -0.0076(14) -0.0052(13) 
C41 0.0387(19) 0.0166(15) 0.049(2) -0.0052(14) -0.0059(16) -0.0038(13) 
C42 0.0259(16) 0.0275(16) 0.0386(19) -0.0027(14) -0.0060(14) 0.0037(13) 
C43 0.0268(16) 0.0368(18) 0.042(2) -0.0120(15) -0.0052(14) -0.0070(14) 
C44 0.0318(17) 0.0240(15) 0.0362(18) -0.0074(13) -0.0024(14) -0.0082(13) 
O2 0.0421(13) 0.0324(12) 0.0317(12) 0.0005(10) -0.0111(10) -0.0133(10) 
C45 0.056(2) 0.049(2) 0.046(2) -0.0034(18) -0.0223(18) -0.0219(19) 
C46 0.067(3) 0.046(2) 0.052(2) -0.0055(19) -0.025(2) -0.010(2) 
C47 0.067(3) 0.072(3) 0.064(3) -0.020(2) -0.015(2) -0.019(3) 
C48 0.097(4) 0.038(2) 0.072(3) -0.006(2) -0.040(3) -0.004(2) 
 
_geom_special_details 
; 
 All esds (except the esd in the dihedral angle between two l.s. planes) 
 are estimated using the full covariance matrix.  The cell esds are taken 
 into account individually in the estimation of esds in distances, angles 
 and torsion angles; correlations between esds in cell parameters are only 
 used when they are defined by crystal symmetry.  An approximate (isotropic) 
 treatment of cell esds is used for estimating esds involving l.s. planes. 
; 
 
loop_ 
 _geom_bond_atom_site_label_1 
 _geom_bond_atom_site_label_2 
 _geom_bond_distance 
 _geom_bond_site_symmetry_2 
 _geom_bond_publ_flag 
Cu1 N1 1.887(3) . ? 
Cu1 N3 1.932(3) . ? 
Cu1 N4 1.996(3) . ? 
Cu1 N2 2.005(3) . ? 
O1 C4 1.205(4) . ? 
N1 C3 1.354(4) . ? 
N1 C1 1.368(4) . ? 
N2 C6 1.369(4) . ? 
N2 C9 1.394(4) . ? 
N3 C14 1.374(4) . ? 
N3 C11 1.379(4) . ? 
N4 C19 1.374(4) . ? 
N4 C16 1.385(4) . ? 
C1 C20 1.369(4) . ? 
C1 C2 1.537(5) . ? 
C2 C4 1.491(5) . ? 
C2 C3 1.535(4) . ? 
C2 H2 1.0000 . ? 
C3 C5 1.383(4) . ? 
C4 O2 1.337(4) . ? 
C5 C6 1.421(4) . ? 
C5 C21 1.472(5) . ? 
C6 C7 1.436(4) . ? 
C7 C8 1.345(4) . ? 
C7 H7 0.9500 . ? 
C8 C9 1.441(4) . ? 
C8 H8 0.9500 . ? 
C9 C10 1.381(4) . ? 
C10 C11 1.415(4) . ? 
C10 C27 1.500(4) . ? 
C11 C12 1.424(5) . ? 
C12 C13 1.356(5) . ? 
C12 H12 0.9500 . ? 
C13 C14 1.426(4) . ? 
C13 H13 0.9500 . ? 
C14 C15 1.417(4) . ? 
C15 C16 1.390(4) . ? 
C15 C33 1.490(5) . ? 
C16 C17 1.439(4) . ? 
C17 C18 1.352(4) . ? 
C17 H17 0.9500 . ? 
C18 C19 1.437(4) . ? 
C18 H18 0.9500 . ? 
C19 C20 1.412(4) . ? 
C20 C39 1.494(4) . ? 
C21 C26 1.393(4) . ? 
C21 C22 1.393(4) . ? 
C22 C23 1.378(5) . ? 
C22 H22 0.9500 . ? 
C23 C24 1.390(5) . ? 
C23 H23 0.9500 . ? 
C24 C25 1.364(5) . ? 
C24 H24 0.9500 . ? 
C25 C26 1.385(5) . ? 
C25 H25 0.9500 . ? 
C26 H26 0.9500 . ? 
C27 C32 1.385(4) . ? 
C27 C28 1.389(5) . ? 
C28 C29 1.397(4) . ? 
C28 H28 0.9500 . ? 
C29 C30 1.376(5) . ? 
C29 H29 0.9500 . ? 
C30 C31 1.367(5) . ? 
C30 H30 0.9500 . ? 
C31 C32 1.395(4) . ? 
C31 H31 0.9500 . ? 
C32 H32 0.9500 . ? 
C33 C34 1.387(5) . ? 
C33 C38 1.398(5) . ? 
C34 C35 1.382(5) . ? 
C34 H34 0.9500 . ? 
C35 C36 1.383(6) . ? 
C35 H35 0.9500 . ? 
C36 C37 1.375(6) . ? 
C36 H36 0.9500 . ? 
C37 C38 1.387(5) . ? 
C37 H37 0.9500 . ? 
C38 H38 0.9500 . ? 
C39 C44 1.388(4) . ? 
C39 C40 1.393(4) . ? 
C40 C41 1.394(4) . ? 
C40 H40 0.9500 . ? 
C41 C42 1.378(5) . ? 
C41 H41 0.9500 . ? 
C42 C43 1.376(5) . ? 
C42 H42 0.9500 . ? 
C43 C44 1.388(4) . ? 
C43 H43 0.9500 . ? 
C44 H44 0.9500 . ? 
O2 C45 1.466(4) . ? 
C45 C46 1.483(5) . ? 
C45 H45A 0.9900 . ? 
C45 H45B 0.9900 . ? 
C46 C47 1.460(6) . ? 
C46 H46A 0.9900 . ? 
C46 H46B 0.9900 . ? 
C47 C48 1.560(6) . ? 
C47 H47A 0.9900 . ? 
C47 H47B 0.9900 . ? 
C48 H48A 0.9800 . ? 
C48 H48B 0.9800 . ? 
C48 H48C 0.9800 . ? 
 
loop_ 
 _geom_angle_atom_site_label_1 
 _geom_angle_atom_site_label_2 
 _geom_angle_atom_site_label_3 
 _geom_angle 
 _geom_angle_site_symmetry_1 
 _geom_angle_site_symmetry_3 
 _geom_angle_publ_flag 
N1 Cu1 N3 179.44(11) . . ? 
N1 Cu1 N4 87.30(10) . . ? 
N3 Cu1 N4 92.89(10) . . ? 
N1 Cu1 N2 86.48(10) . . ? 
N3 Cu1 N2 93.37(10) . . ? 
N4 Cu1 N2 172.84(10) . . ? 
C3 N1 C1 93.5(2) . . ? 
C3 N1 Cu1 132.9(2) . . ? 
C1 N1 Cu1 132.2(2) . . ? 
C6 N2 C9 106.8(3) . . ? 
C6 N2 Cu1 129.06(19) . . ? 
C9 N2 Cu1 124.2(2) . . ? 
C14 N3 C11 106.4(2) . . ? 
C14 N3 Cu1 126.83(19) . . ? 
C11 N3 Cu1 126.3(2) . . ? 
C19 N4 C16 106.6(3) . . ? 
C19 N4 Cu1 127.9(2) . . ? 
C16 N4 Cu1 124.8(2) . . ? 
N1 C1 C20 126.6(3) . . ? 
N1 C1 C2 92.5(2) . . ? 
C20 C1 C2 140.8(3) . . ? 
C4 C2 C3 117.3(3) . . ? 
C4 C2 C1 117.5(3) . . ? 
C3 C2 C1 80.4(2) . . ? 
C4 C2 H2 112.7 . . ? 
C3 C2 H2 112.7 . . ? 
C1 C2 H2 112.7 . . ? 
N1 C3 C5 127.3(3) . . ? 
N1 C3 C2 93.2(2) . . ? 
C5 C3 C2 139.0(3) . . ? 
O1 C4 O2 124.3(3) . . ? 
O1 C4 C2 124.4(3) . . ? 
O2 C4 C2 111.3(3) . . ? 
C3 C5 C6 117.8(3) . . ? 
C3 C5 C21 120.1(3) . . ? 
C6 C5 C21 121.9(3) . . ? 
N2 C6 C5 125.8(3) . . ? 
N2 C6 C7 109.3(3) . . ? 
C5 C6 C7 124.9(3) . . ? 
C8 C7 C6 107.9(3) . . ? 
C8 C7 H7 126.0 . . ? 
C6 C7 H7 126.0 . . ? 
C7 C8 C9 107.4(3) . . ? 
C7 C8 H8 126.3 . . ? 
C9 C8 H8 126.3 . . ? 
C10 C9 N2 125.4(3) . . ? 
C10 C9 C8 126.0(3) . . ? 
N2 C9 C8 108.6(3) . . ? 
C9 C10 C11 125.3(3) . . ? 
C9 C10 C27 117.9(3) . . ? 
C11 C10 C27 116.8(3) . . ? 
N3 C11 C10 125.0(3) . . ? 
N3 C11 C12 109.5(3) . . ? 
C10 C11 C12 125.5(3) . . ? 
C13 C12 C11 107.3(3) . . ? 
C13 C12 H12 126.3 . . ? 
C11 C12 H12 126.3 . . ? 
C12 C13 C14 107.3(3) . . ? 
C12 C13 H13 126.3 . . ? 
C14 C13 H13 126.3 . . ? 
N3 C14 C15 125.0(3) . . ? 
N3 C14 C13 109.5(3) . . ? 
C15 C14 C13 125.6(3) . . ? 
C16 C15 C14 124.5(3) . . ? 
C16 C15 C33 118.7(3) . . ? 
C14 C15 C33 116.9(3) . . ? 
N4 C16 C15 125.4(3) . . ? 
N4 C16 C17 109.3(3) . . ? 
C15 C16 C17 125.2(3) . . ? 
C18 C17 C16 107.0(3) . . ? 
C18 C17 H17 126.5 . . ? 
C16 C17 H17 126.5 . . ? 
C17 C18 C19 107.8(3) . . ? 
C17 C18 H18 126.1 . . ? 
C19 C18 H18 126.1 . . ? 
N4 C19 C20 126.0(3) . . ? 
N4 C19 C18 109.2(3) . . ? 
C20 C19 C18 124.7(3) . . ? 
C1 C20 C19 119.2(3) . . ? 
C1 C20 C39 120.7(3) . . ? 
C19 C20 C39 119.9(3) . . ? 
C26 C21 C22 117.7(3) . . ? 
C26 C21 C5 121.6(3) . . ? 
C22 C21 C5 120.6(3) . . ? 
C23 C22 C21 121.4(3) . . ? 
C23 C22 H22 119.3 . . ? 
C21 C22 H22 119.3 . . ? 
C22 C23 C24 119.9(3) . . ? 
C22 C23 H23 120.1 . . ? 
C24 C23 H23 120.1 . . ? 
C25 C24 C23 119.5(3) . . ? 
C25 C24 H24 120.2 . . ? 
C23 C24 H24 120.2 . . ? 
C24 C25 C26 120.8(3) . . ? 
C24 C25 H25 119.6 . . ? 
C26 C25 H25 119.6 . . ? 
C25 C26 C21 120.7(3) . . ? 
C25 C26 H26 119.7 . . ? 
C21 C26 H26 119.7 . . ? 
C32 C27 C28 119.3(3) . . ? 
C32 C27 C10 119.5(3) . . ? 
C28 C27 C10 121.2(3) . . ? 
C27 C28 C29 119.9(3) . . ? 
C27 C28 H28 120.1 . . ? 
C29 C28 H28 120.1 . . ? 
C30 C29 C28 120.2(3) . . ? 
C30 C29 H29 119.9 . . ? 
C28 C29 H29 119.9 . . ? 
C31 C30 C29 120.2(3) . . ? 
C31 C30 H30 119.9 . . ? 
C29 C30 H30 119.9 . . ? 
C30 C31 C32 120.3(3) . . ? 
C30 C31 H31 119.9 . . ? 
C32 C31 H31 119.9 . . ? 
C27 C32 C31 120.2(3) . . ? 
C27 C32 H32 119.9 . . ? 
C31 C32 H32 119.9 . . ? 
C34 C33 C38 118.4(3) . . ? 
C34 C33 C15 121.6(3) . . ? 
C38 C33 C15 120.0(3) . . ? 
C35 C34 C33 121.0(4) . . ? 
C35 C34 H34 119.5 . . ? 
C33 C34 H34 119.5 . . ? 
C34 C35 C36 120.2(4) . . ? 
C34 C35 H35 119.9 . . ? 
C36 C35 H35 119.9 . . ? 
C37 C36 C35 119.6(4) . . ? 
C37 C36 H36 120.2 . . ? 
C35 C36 H36 120.2 . . ? 
C36 C37 C38 120.6(4) . . ? 
C36 C37 H37 119.7 . . ? 
C38 C37 H37 119.7 . . ? 
C37 C38 C33 120.2(4) . . ? 
C37 C38 H38 119.9 . . ? 
C33 C38 H38 119.9 . . ? 
C44 C39 C40 118.8(3) . . ? 
C44 C39 C20 120.5(3) . . ? 
C40 C39 C20 120.6(3) . . ? 
C39 C40 C41 120.4(3) . . ? 
C39 C40 H40 119.8 . . ? 
C41 C40 H40 119.8 . . ? 
C42 C41 C40 120.2(3) . . ? 
C42 C41 H41 119.9 . . ? 
C40 C41 H41 119.9 . . ? 
C43 C42 C41 119.7(3) . . ? 
C43 C42 H42 120.1 . . ? 
C41 C42 H42 120.1 . . ? 
C42 C43 C44 120.6(3) . . ? 
C42 C43 H43 119.7 . . ? 
C44 C43 H43 119.7 . . ? 
C43 C44 C39 120.4(3) . . ? 
C43 C44 H44 119.8 . . ? 
C39 C44 H44 119.8 . . ? 
C4 O2 C45 114.9(3) . . ? 
O2 C45 C46 109.9(3) . . ? 
O2 C45 H45A 109.7 . . ? 
C46 C45 H45A 109.7 . . ? 
O2 C45 H45B 109.7 . . ? 
C46 C45 H45B 109.7 . . ? 
H45A C45 H45B 108.2 . . ? 
C47 C46 C45 115.3(4) . . ? 
C47 C46 H46A 108.5 . . ? 
C45 C46 H46A 108.5 . . ? 
C47 C46 H46B 108.5 . . ? 
C45 C46 H46B 108.5 . . ? 
H46A C46 H46B 107.5 . . ? 
C46 C47 C48 113.3(4) . . ? 
C46 C47 H47A 108.9 . . ? 
C48 C47 H47A 108.9 . . ? 
C46 C47 H47B 108.9 . . ? 
C48 C47 H47B 108.9 . . ? 
H47A C47 H47B 107.7 . . ? 
C47 C48 H48A 109.5 . . ? 
C47 C48 H48B 109.5 . . ? 
H48A C48 H48B 109.5 . . ? 
C47 C48 H48C 109.5 . . ? 
H48A C48 H48C 109.5 . . ? 
H48B C48 H48C 109.5 . . ? 
 
loop_ 
 _geom_torsion_atom_site_label_1 
 _geom_torsion_atom_site_label_2 
 _geom_torsion_atom_site_label_3 
 _geom_torsion_atom_site_label_4 
 _geom_torsion 
 _geom_torsion_site_symmetry_1 
 _geom_torsion_site_symmetry_2 
 _geom_torsion_site_symmetry_3 
 _geom_torsion_site_symmetry_4 
 _geom_torsion_publ_flag 
N3 Cu1 N1 C3 80(11) . . . . ? 
N4 Cu1 N1 C3 -170.3(3) . . . . ? 
N2 Cu1 N1 C3 6.1(3) . . . . ? 
N3 Cu1 N1 C1 -117(11) . . . . ? 
N4 Cu1 N1 C1 -7.3(3) . . . . ? 
N2 Cu1 N1 C1 169.1(3) . . . . ? 
N1 Cu1 N2 C6 -5.4(3) . . . . ? 
N3 Cu1 N2 C6 175.2(3) . . . . ? 
N4 Cu1 N2 C6 24.4(10) . . . . ? 
N1 Cu1 N2 C9 176.3(2) . . . . ? 
N3 Cu1 N2 C9 -3.2(2) . . . . ? 
N4 Cu1 N2 C9 -153.9(8) . . . . ? 
N1 Cu1 N3 C14 104(11) . . . . ? 
N4 Cu1 N3 C14 -5.5(3) . . . . ? 
N2 Cu1 N3 C14 177.9(2) . . . . ? 
N1 Cu1 N3 C11 -68(11) . . . . ? 
N4 Cu1 N3 C11 -177.0(2) . . . . ? 
N2 Cu1 N3 C11 6.5(2) . . . . ? 
N1 Cu1 N4 C19 9.8(2) . . . . ? 
N3 Cu1 N4 C19 -170.7(2) . . . . ? 
N2 Cu1 N4 C19 -19.9(10) . . . . ? 
N1 Cu1 N4 C16 178.6(2) . . . . ? 
N3 Cu1 N4 C16 -1.9(2) . . . . ? 
N2 Cu1 N4 C16 148.9(8) . . . . ? 
C3 N1 C1 C20 171.6(3) . . . . ? 
Cu1 N1 C1 C20 4.0(5) . . . . ? 
C3 N1 C1 C2 -4.6(2) . . . . ? 
Cu1 N1 C1 C2 -172.2(2) . . . . ? 
N1 C1 C2 C4 120.0(3) . . . . ? 
C20 C1 C2 C4 -55.3(5) . . . . ? 
N1 C1 C2 C3 4.1(2) . . . . ? 
C20 C1 C2 C3 -171.1(4) . . . . ? 
C1 N1 C3 C5 -169.0(3) . . . . ? 
Cu1 N1 C3 C5 -1.5(5) . . . . ? 
C1 N1 C3 C2 4.6(2) . . . . ? 
Cu1 N1 C3 C2 172.1(2) . . . . ? 
C4 C2 C3 N1 -120.2(3) . . . . ? 
C1 C2 C3 N1 -4.2(2) . . . . ? 
C4 C2 C3 C5 52.0(5) . . . . ? 
C1 C2 C3 C5 168.1(4) . . . . ? 
C3 C2 C4 O1 32.8(5) . . . . ? 
C1 C2 C4 O1 -60.4(4) . . . . ? 
C3 C2 C4 O2 -146.8(3) . . . . ? 
C1 C2 C4 O2 120.0(3) . . . . ? 
N1 C3 C5 C6 -6.3(5) . . . . ? 
C2 C3 C5 C6 -176.5(3) . . . . ? 
N1 C3 C5 C21 168.8(3) . . . . ? 
C2 C3 C5 C21 -1.5(6) . . . . ? 
C9 N2 C6 C5 178.8(3) . . . . ? 
Cu1 N2 C6 C5 0.2(4) . . . . ? 
C9 N2 C6 C7 -1.3(3) . . . . ? 
Cu1 N2 C6 C7 -179.9(2) . . . . ? 
C3 C5 C6 N2 6.6(5) . . . . ? 
C21 C5 C6 N2 -168.4(3) . . . . ? 
C3 C5 C6 C7 -173.3(3) . . . . ? 
C21 C5 C6 C7 11.8(5) . . . . ? 
N2 C6 C7 C8 0.9(4) . . . . ? 
C5 C6 C7 C8 -179.2(3) . . . . ? 
C6 C7 C8 C9 -0.1(3) . . . . ? 
C6 N2 C9 C10 -177.7(3) . . . . ? 
Cu1 N2 C9 C10 1.0(4) . . . . ? 
C6 N2 C9 C8 1.2(3) . . . . ? 
Cu1 N2 C9 C8 179.90(19) . . . . ? 
C7 C8 C9 C10 178.2(3) . . . . ? 
C7 C8 C9 N2 -0.7(3) . . . . ? 
N2 C9 C10 C11 -0.6(5) . . . . ? 
C8 C9 C10 C11 -179.4(3) . . . . ? 
N2 C9 C10 C27 177.5(3) . . . . ? 
C8 C9 C10 C27 -1.3(5) . . . . ? 
C14 N3 C11 C10 179.1(3) . . . . ? 
Cu1 N3 C11 C10 -8.0(4) . . . . ? 
C14 N3 C11 C12 -1.4(3) . . . . ? 
Cu1 N3 C11 C12 171.5(2) . . . . ? 
C9 C10 C11 N3 4.3(5) . . . . ? 
C27 C10 C11 N3 -173.8(3) . . . . ? 
C9 C10 C11 C12 -175.1(3) . . . . ? 
C27 C10 C11 C12 6.7(5) . . . . ? 
N3 C11 C12 C13 0.5(4) . . . . ? 
C10 C11 C12 C13 -180.0(3) . . . . ? 
C11 C12 C13 C14 0.5(4) . . . . ? 
C11 N3 C14 C15 -178.8(3) . . . . ? 
Cu1 N3 C14 C15 8.4(4) . . . . ? 
C11 N3 C14 C13 1.7(3) . . . . ? 
Cu1 N3 C14 C13 -171.1(2) . . . . ? 
C12 C13 C14 N3 -1.4(4) . . . . ? 
C12 C13 C14 C15 179.1(3) . . . . ? 
N3 C14 C15 C16 -2.4(5) . . . . ? 
C13 C14 C15 C16 177.1(3) . . . . ? 
N3 C14 C15 C33 179.1(3) . . . . ? 
C13 C14 C15 C33 -1.4(5) . . . . ? 
C19 N4 C16 C15 178.4(3) . . . . ? 
Cu1 N4 C16 C15 7.6(4) . . . . ? 
C19 N4 C16 C17 1.1(3) . . . . ? 
Cu1 N4 C16 C17 -169.7(2) . . . . ? 
C14 C15 C16 N4 -6.1(5) . . . . ? 
C33 C15 C16 N4 172.4(3) . . . . ? 
C14 C15 C16 C17 170.7(3) . . . . ? 
C33 C15 C16 C17 -10.8(5) . . . . ? 
N4 C16 C17 C18 -0.3(4) . . . . ? 
C15 C16 C17 C18 -177.5(3) . . . . ? 
C16 C17 C18 C19 -0.7(3) . . . . ? 
C16 N4 C19 C20 179.8(3) . . . . ? 
Cu1 N4 C19 C20 -9.8(4) . . . . ? 
C16 N4 C19 C18 -1.5(3) . . . . ? 
Cu1 N4 C19 C18 168.9(2) . . . . ? 
C17 C18 C19 N4 1.4(3) . . . . ? 
C17 C18 C19 C20 -179.9(3) . . . . ? 
N1 C1 C20 C19 0.2(5) . . . . ? 
C2 C1 C20 C19 174.3(3) . . . . ? 
N1 C1 C20 C39 -174.0(3) . . . . ? 
C2 C1 C20 C39 0.1(6) . . . . ? 
N4 C19 C20 C1 3.1(4) . . . . ? 
C18 C19 C20 C1 -175.4(3) . . . . ? 
N4 C19 C20 C39 177.3(3) . . . . ? 
C18 C19 C20 C39 -1.2(4) . . . . ? 
C3 C5 C21 C26 -129.0(3) . . . . ? 
C6 C5 C21 C26 45.9(4) . . . . ? 
C3 C5 C21 C22 47.2(4) . . . . ? 
C6 C5 C21 C22 -137.9(3) . . . . ? 
C26 C21 C22 C23 -1.6(5) . . . . ? 
C5 C21 C22 C23 -177.9(3) . . . . ? 
C21 C22 C23 C24 1.2(5) . . . . ? 
C22 C23 C24 C25 -0.6(5) . . . . ? 
C23 C24 C25 C26 0.5(5) . . . . ? 
C24 C25 C26 C21 -0.9(5) . . . . ? 
C22 C21 C26 C25 1.4(5) . . . . ? 
C5 C21 C26 C25 177.7(3) . . . . ? 
C9 C10 C27 C32 -106.3(4) . . . . ? 
C11 C10 C27 C32 71.9(4) . . . . ? 
C9 C10 C27 C28 72.7(4) . . . . ? 
C11 C10 C27 C28 -109.0(4) . . . . ? 
C32 C27 C28 C29 -0.2(5) . . . . ? 
C10 C27 C28 C29 -179.3(3) . . . . ? 
C27 C28 C29 C30 0.1(6) . . . . ? 
C28 C29 C30 C31 -0.2(6) . . . . ? 
C29 C30 C31 C32 0.3(5) . . . . ? 
C28 C27 C32 C31 0.4(5) . . . . ? 
C10 C27 C32 C31 179.5(3) . . . . ? 
C30 C31 C32 C27 -0.4(5) . . . . ? 
C16 C15 C33 C34 117.8(3) . . . . ? 
C14 C15 C33 C34 -63.6(4) . . . . ? 
C16 C15 C33 C38 -64.9(4) . . . . ? 
C14 C15 C33 C38 113.6(3) . . . . ? 
C38 C33 C34 C35 -2.2(5) . . . . ? 
C15 C33 C34 C35 175.2(3) . . . . ? 
C33 C34 C35 C36 -0.5(5) . . . . ? 
C34 C35 C36 C37 2.3(6) . . . . ? 
C35 C36 C37 C38 -1.4(5) . . . . ? 
C36 C37 C38 C33 -1.3(5) . . . . ? 
C34 C33 C38 C37 3.0(5) . . . . ? 
C15 C33 C38 C37 -174.4(3) . . . . ? 
C1 C20 C39 C44 65.0(4) . . . . ? 
C19 C20 C39 C44 -109.1(3) . . . . ? 
C1 C20 C39 C40 -116.4(3) . . . . ? 
C19 C20 C39 C40 69.4(4) . . . . ? 
C44 C39 C40 C41 0.1(5) . . . . ? 
C20 C39 C40 C41 -178.5(3) . . . . ? 
C39 C40 C41 C42 -1.0(5) . . . . ? 
C40 C41 C42 C43 1.0(5) . . . . ? 
C41 C42 C43 C44 -0.1(5) . . . . ? 
C42 C43 C44 C39 -0.8(5) . . . . ? 
C40 C39 C44 C43 0.9(5) . . . . ? 
C20 C39 C44 C43 179.5(3) . . . . ? 
O1 C4 O2 C45 0.6(5) . . . . ? 
C2 C4 O2 C45 -179.8(3) . . . . ? 
C4 O2 C45 C46 168.3(3) . . . . ? 
O2 C45 C46 C47 -69.0(5) . . . . ? 
C45 C46 C47 C48 175.0(4) . . . . ? 
 
_diffrn_measured_fraction_theta_max    0.998 
_diffrn_reflns_theta_full              26.43 
_diffrn_measured_fraction_theta_full   0.998 
_refine_diff_density_max    1.039 
_refine_diff_density_min   -0.342 
_refine_diff_density_rms    0.072 

# start Validation Reply Form
_vrf_PLAT094_07006             
;
PROBLEM: Ratio of Maximum / Minimum Residual Density
RESPONSE:  
Highest peak 1.04 at 0.5761 0.1411 0.3928 [1.02 A from H46A], 
Deepest hole -0.34 at 0.6386 0.1582 0.3037 [0.61 A from C47]
;
